Table 1: Patient characteristics (N=9)

| Demographics                             | Values       |
|------------------------------------------|--------------|
| Age, median (range) (y)                  | 49(13-69)    |
| Male sex, n(%)                           | 5(55)        |
| Caucasian, n(%)                          | 6(67)        |
| Hispanic, n(%)                           | 3(33)        |
|                                          |              |
| <b>Type of malignancy, n(%)</b>          |              |
| Diffuse Large B cell Lymphoma            | 3(33)        |
| Follicular Lymphoma                      | 1(11)        |
| B cell Acute Lymphoblastic Leukemia      | 2(22)        |
| T cell Acute Lymphoblastic Leukemia      | 1(11)        |
| Chronic Lymphocytic Leukemia             | 1(11)        |
| Metastatic sarcoma                       | 1(11)        |
|                                          |              |
| <b>Clinical characteristics, n(%)</b>    |              |
| Chemotherapy within 3mo of CAR-T.        | 6(67)        |
| Prior hematopoietic stem cell transplant | 6(67)        |
|                                          |              |
| <b>Lab findings, n(%)</b>                |              |
| Lymphopenia <1000/mm <sup>3</sup>        | 6(67)        |
| ANC<500/mm <sup>3</sup>                  | 4(44)        |
| Albumin, median(range, mg/dl)            | 3.5(2.7-4.1) |
| IgG <400mg/dl,receiving IVIG             | 8(89)*       |

\*IgG levels not documented for the 9<sup>th</sup> patient

Table 2: CAR-T related factors

| CAR-T related factors,n(%)                       | Values |
|--------------------------------------------------|--------|
| <b>Cyclophosphamide/Fludarabine conditioning</b> | 8(89)  |
| <b>Type of car T</b>                             |        |
| Anti-CD19 (CD4,CD8)                              | 6(67)  |
| CD8+ cytotoxic T cells                           | 1(11)  |
| Cord blood Natural Killer cells                  | 2(22)  |
|                                                  |        |
| <b>CAR-T toxicities</b>                          |        |
| Cytokine release syndrome                        | 5(55)  |
| Car T related encephalopathy syndrome            | 1(11)  |
|                                                  |        |
| Immune related colitis                           | 1(11)  |

Table 3: NoV Genotypes

| NoV Genotypes | Number of patients (n) |
|---------------|------------------------|
| GII.2(P16)    | 2                      |
| GII.4(P31)    | 2                      |
| GII.6(P7)     | 1                      |
| GII.12(P16)   | 1                      |

**Conclusion.** NoV belonging to various genotypes is an important cause of acute and chronic diarrhea in patients receiving CAR-T cell therapy.

**Disclosures.** Adilene Olvera, MPH MLS (ASCP), MERK (Grant/Research Support, Scientific Research Study Investigator) Robert L. Atmar, MD, Takeda Vaccines, Inc. (Grant/Research Support) Mary K. Estes, PhD, Takeda Vaccines (Consultant, Grant/Research Support)

#### 1099. Opportunistic Infections Among Long Term Survivors of Kidney Transplantation: Defining Risk Factors

Harry Cheung<sup>1</sup>; Marwan M. Azar, M.D.<sup>2</sup>; Geliang Gan, PhD MPH<sup>3</sup>; Yanhong Deng, MPH<sup>4</sup>; Elizabeth A. Cohen, PharmD<sup>5</sup>; Sanjay Kulkarni, MD MHC<sup>6</sup>; Maricar F. Malinis, M.D, FACP, FIDSA, FAST<sup>6</sup>; <sup>1</sup>Yale School of Medicine, New Haven, CT; <sup>2</sup>Yale School of Medicine, New Haven, CT; <sup>3</sup>Yale Center for Analytical Sciences, New Haven, Connecticut; <sup>4</sup>Yale school of public health, New Haven, Connecticut; <sup>5</sup>Yale New Haven Hospitals, New Haven, Connecticut; <sup>6</sup>Yale University, New Haven, Connecticut

Session: P-49. Infections in Immunocompromised Individuals

**Background.** Opportunistic infections (OIs) in kidney transplant recipients (KTR) most commonly occur in the early post-transplant period or with increased immunosuppression, largely as a result of impaired T-cell function. Additionally, age confers susceptibility to infection independent of time post-transplant. The combined impact of cumulative immunosuppression and immunosenescence on infection risk of long-term KT survivors has not been well described.

**Methods.** We performed a retrospective chart review of patients age ≥ 18 years who underwent KT between 2003 to 2009 and who survived ≥ 10 years post-KT, in order to evaluate the risk factors for OIs. Demographics, comorbidities, immunosuppression, and clinical data for OIs occurring ≥ 10 years of KT were collected. AST ID Working Group on Infectious Disease Monitoring definitions for OIs was used. Risk factors for OIs were assessed by simple logistic regression.

**Results.** Of 332 KTR, 16 (4.8%) had an OI with 18 total episodes. Of 16 KTR, half were white, 10 (62.5%) were male, median age at time of transplant was 43 (range 25-72) and the median post-transplant follow-up was 14.2 years (range 10.3-37.6). The mean Charlson Comorbidity Index (CCI) at diagnosis was 5.6 (S.D. 3.6). Ten patients (62.5%) were on mycophenolate-based regimens. The mean absolute lymphocyte count (ALC) at the time of OI was 0.78 x 10<sup>3</sup>/μL (S.D. 0.43). Two (12.5%) had acute rejection within 1 year of OI. Of 18 OI episodes, there were 6 PJP, 2 candida esophagitis, 3 CMV (2 viremia, 1 colitis), 2 cryptococcal infections (1 meningitis, 1 myositis/disseminated), 2 adenovirus (pneumonia, colitis), 2 VZV (herpes zoster) and 1 HSV (esophagitis). Two patients had 2 concurrent OIs (1 had PJP and cryptococcus and 1 had HSV and candida esophagitis). Three died within 30-days of OI diagnosis. OI incidence was associated with years from date of transplant [OR 1.3, p=0.002], cerebrovascular disease [OR 4.45, p=0.02], and lower ALC [OR 5.9, p < 0.05]. CCI also trended towards association [OR 1.24, p=0.09].

Table 1: Demographics, comorbidities, immunosuppression, and clinical data for patients with OIs

| Variable                                                | Very-Late Onset Opportunistic Infections (n = 16) |
|---------------------------------------------------------|---------------------------------------------------|
| Median age at time of transplant (range)                | 43 (25-72)                                        |
| Age at time of transplant                               |                                                   |
| 18-29                                                   | 2 (12.5%)                                         |
| 30-39                                                   | 4 (25%)                                           |
| 40-49                                                   | 5 (31.3%)                                         |
| 50-59                                                   | 1 (6.2%)                                          |
| 60-69                                                   | 2 (12.5%)                                         |
| 70-79                                                   | 2 (12.5%)                                         |
| Living (vs. deceased)                                   | 11 (68.8%)                                        |
| Living donor (vs. deceased/unknown)                     | 7 (43.8%)                                         |
| Retransplantation                                       | 1 (6.2%)                                          |
| Median Years From Transplant to Last Follow Up (range)  | 14.2 (10-37)                                      |
| Mean Charlson Comorbidity Index of Living Patients (SD) | 5.6 (3.6)                                         |
| Male sex (versus female)                                | 10 (62.5%)                                        |
| Race                                                    |                                                   |
| Asian                                                   | 2 (12.5%)                                         |
| Black                                                   | 3 (18.8%)                                         |
| Hispanic                                                | 3 (18.8%)                                         |
| White                                                   | 8 (50%)                                           |
| Induction Methods                                       |                                                   |
| Basiliximab                                             | 3 (18.8%)                                         |
| Daclizumab                                              | 1 (6.2%)                                          |
| Methylprednisone                                        | 7 (43.8%)                                         |
| Thymoglobulin                                           | 3 (18.8%)                                         |
| Unknown/Unspecified                                     | 2 (12.5%)                                         |
| Maintenance Regimens                                    |                                                   |
| Belatacept and prednisone                               | 1 (6.2%)                                          |
| Belatacept, mycophenolate, and prednisone               | 4 (25%)                                           |
| Cyclosporine, mycophenolate, and prednisone             | 1 (6.2%)                                          |
| Tacrolimus and prednisone                               | 2 (12.5%)                                         |
| Tacrolimus, mycophenolate, and prednisone               | 4 (25%)                                           |
| Other                                                   | 4 (25%)                                           |
| Comorbidities at Time of Review                         |                                                   |
| Hepatitis C positive                                    | 2 (12.5%)                                         |
| History of Diabetes                                     | 6 (37.5%)                                         |
| Currently on Dialysis                                   | 2 (12.5%)                                         |
| History of Cardiovascular Disease                       | 5 (31.3%)                                         |
| History of Lung Disease                                 | 0                                                 |
| History of Chronic Liver Disease                        | 0                                                 |
| History of Cerebrovascular Injury                       | 4 (25%)                                           |
| History of Malignancy                                   | 4 (25%)                                           |
| Number of Infections                                    |                                                   |
| 1                                                       | 6 (37.5%)                                         |
| 2                                                       | 5 (31.3%)                                         |
| 3                                                       | 2 (12.5%)                                         |
| 4+                                                      | 3 (18.8%)                                         |
| Serologic Data                                          |                                                   |
| CMV D+/R-                                               | 2 (14.3%)                                         |
| CMV D-/R-                                               | 0                                                 |
| CMV D7/R-                                               | 4 (25%)                                           |
| CMV D+/R+                                               | 0                                                 |
| CMV D-/R+                                               | 1 (6.2%)                                          |
| CMV D7/R+                                               | 8 (50%)                                           |
| Mean Absolute Lymphocyte Counts (10 <sup>3</sup> /μL)   | 0.78                                              |

Table 2: Detailed characteristics of each patient with opportunistic infections

| Age at Time of Transplant | Reason for Transplant        | OS  | OS Time (Yr) | OS Status | CMV Status | Admission Immunosuppression             | Total Number of Opportunistic Infections | Treatment for Opportunistic Infections (Type of Drug) | Response to Treatment (Type of Drug) | Age at Time of Opportunistic Infection | Type of Opportunistic Infection | Pathogen                   | Median Charlaton Comorbidity Index at Time of OI | OS Status |
|---------------------------|------------------------------|-----|--------------|-----------|------------|-----------------------------------------|------------------------------------------|-------------------------------------------------------|--------------------------------------|----------------------------------------|---------------------------------|----------------------------|--------------------------------------------------|-----------|
| 35                        | Acute Myeloid Leukemia       | 1   | 2            | 1         | D+/R-      | Belatacept + Mycophenolate + Prednisone | 2                                        | 1                                                     | 100%                                 | 65 Years Old                           | Pneumonia                       | Adenovirus                 | 0.5                                              | Alive     |
| 43                        | AML                          | 7   | 1            | 2         | D+/R-      | Belatacept + Mycophenolate + Prednisone | 2                                        | 2                                                     | 100%                                 | 73 Years Old                           | Viral                           | CMV                        | 1.1                                              | Alive     |
| 47                        | Hepatoerythroblastosis       | 4   | 2            | 2         | D+/R-      | Mycophenolate + Prednisone              | 1                                        | 2                                                     | 100%                                 | 62 Years Old                           | Esophagitis                     | HSV + Candida              | 0.8                                              | Alive     |
| 50                        | DM1                          | 7   | 1            | 2         | D+/R-      | Belatacept + Mycophenolate + Prednisone | 3                                        | 2                                                     | 100%                                 | 63 Years Old                           | Esophagitis                     | Candida                    | 0.7                                              | Alive     |
| 52                        | MDS                          | N/A | 2            | 2         | D+/R-      | Belatacept + Mycophenolate + Prednisone | 5                                        | 2                                                     | 100%                                 | 87 Years Old                           | Neurology                       | Cryptosporidiosis          | 0.2                                              | Deceased  |
| 46                        | DM1                          | 18  | 1            | 2         | D+/R-      | Belatacept + Mycophenolate + Prednisone | 10                                       | 1                                                     | 100%                                 | 89 Years Old                           | Gastro                          | CMV                        | 0.8                                              | Alive     |
| 50                        | DM1                          | 8   | 1            | 2         | D+/R-      | Belatacept + Mycophenolate + Prednisone | 3                                        | 2                                                     | 100%                                 | 81 Years Old                           | Pneumonia                       | P.F.                       | 0.2                                              | Alive     |
| 43                        | Chronic lymphocytic leukemia | 3   | 2            | 1         | D+/R-      | Belatacept + Mycophenolate + Prednisone | 1                                        | 2                                                     | 100%                                 | 54 Years Old                           | Pneumonia                       | P.F.                       | 0.8                                              | Alive     |
| 31                        | DM1                          | N/A | 1            | 1         | D+/R-      | Belatacept + Mycophenolate + Prednisone | 6                                        | 2                                                     | 100%                                 | 58 Years Old                           | Gastro                          | Adenovirus                 | 1.1                                              | Alive     |
| 38                        | Hepatoerythroblastosis       | N/A | 1            | 2         | D+/R-      | Belatacept + Mycophenolate + Prednisone | 1                                        | 1                                                     | 100%                                 | 43 Years Old                           | Pneumonia + Esophagitis         | P.F. and Cryptosporidiosis | 0.2                                              | Deceased  |
| 23                        | Hepatoerythroblastosis       | N/A | 2            | 2         | D+/R-      | Belatacept + Mycophenolate + Prednisone | 2                                        | 2                                                     | 100%                                 | 38 Years Old                           | Gastro                          | Adenovirus                 | 1.1                                              | Alive     |
| 47                        | Hepatoerythroblastosis       | N/A | 2            | 2         | D+/R-      | Belatacept + Mycophenolate + Prednisone | 1                                        | 2                                                     | 100%                                 | 78 Years Old                           | Viral                           | CMV                        | 0.2                                              | Deceased  |
| 41                        | Chronic liver disease (NASH) | 4   | 2            | 2         | D+/R-      | Belatacept + Mycophenolate + Prednisone | 1                                        | 2                                                     | 100%                                 | 51 Years Old                           | Pneumonia                       | P.F.                       | 0.8                                              | Alive     |
| 32                        | Polycystic Kidney Disease    | 3   | 2            | 1         | n/a        | Belatacept + Mycophenolate + Prednisone | 2                                        | 2                                                     | 100%                                 | 66 Years Old                           | Pneumonia                       | P.F.                       | 0.8                                              | Alive     |
| 43                        | ITN                          | 4   | 2            | 2         | n/a        | Belatacept + Mycophenolate + Prednisone | 1                                        | 2                                                     | 100%                                 | 53 Years Old                           | Skin                            | VZV                        | 1.4                                              | Alive     |
| 34                        | Polycystic Kidney Disease    | 3   | 2            | 2         | D+/R-      | Belatacept + Mycophenolate + Prednisone | 1                                        | 2                                                     | 100%                                 | 50                                     | Skin                            | VZV                        | 1.4                                              | Alive     |

**Conclusion.** OIs were infrequently observed beyond 10 years of transplant among long-term survivors of KT. However, OI incidence was associated with poor

outcome. Low ALC and a higher burden of comorbidities were risk factors for very late occurrence of OIs in this population.

**Disclosures.** All Authors: No reported disclosures

**1100. Outcomes of HIV-Associated Lymphoma Treatments: A Contemporary Single Center Cohort Study.**

Rinda Mousa, MBBCh<sup>1</sup>; Xing Song, Ph.D<sup>1</sup>; Lisa A. Clough, MD<sup>1</sup>; Ajay Dias, MD<sup>2</sup>; Fernando Merino, MD, FACP<sup>3</sup>; Wissam El Atrouni, MD<sup>3</sup>; <sup>1</sup>The University of Kansas Medical Center, Edgewater, New Jersey <sup>2</sup>Beth Israel Deaconess Medical Center, Boston, Massachusetts; <sup>3</sup>University of Kansas Medical Center, Kansas City, KS

**Session:** P-49. Infections in Immunocompromised Individuals

**Background.** There is a paucity of outcome studies on HIV-associated lymphoma treated with chemotherapy with or without autologous hematopoietic stem cell transplantation (autoHSCT) in comparison to HIV-uninfected individuals with similar histology.

**Methods.** In our retrospective matched cohort study, we enrolled adult HIV-positive patients with lymphoma treated with chemotherapy with (group 2) or without autoHSCT (group 1) between January 1, 2007 to December 31, 2018 at the University of Kansas Medical Center and followed until May 1, 2020. Group 1 were matched 1:1 to HIV-negative patients based on age, gender, lymphoma histology, stage at diagnosis, year of lymphoma diagnosis, and Group 2 were matched 1:2 to HIV-negative patients based on age at autoHSCT, gender, lymphoma histology, stage at diagnosis and year of transplantation. Overall survival (OS) and progression-free survival (PFS) at 2 years were calculated using Kaplan-Meier (KM) analysis, and adjustment for ECOG and IPI/IPS scores was done using multivariate Cox model.

**Results.** We had 37 HIV+ patients with lymphoma in our cohort: 9 Hodgkin's disease (HD), 28 Non Hodgkin's Lymphoma (NHL). Eleven underwent autoHSCT (3 HD, 8 NHL). The majority were white (76.2%), non-hispanic (92.9%), males (90.5%) and mean age was 46 years. Median CD4 was 172.5, HIV viral load was < 50 copies/mL in 43.2%, and 76.2% were on antiretroviral therapy (ART) at diagnosis. ART was interrupted in 14.6% and adjusted in 40.5% of patients. After excluding rare histological types, 22 in group 1 and 9 in group 2 were included in the matched analysis. On KM survival at 2-years, group 1 had worse OS (75% vs 95%, p=0.02), and a trend for worse PFS (75% vs 90%, p=0.07) than the matched referent group, while group 2 had similar OS (100% vs 94%, p= 0.47) and better PFS (100% vs 70%, p=0.02) than the matched referent group. On Cox models adjusting for ECOG and IPI/IPS, HIV status was no longer independently associated with OS in group 1 or PFS in group 2.

Group 1 HIV lymphoma cases and controls characteristics

| Variable                       | case                                                                                                                                                                                                                    | control                                                                 |
|--------------------------------|-------------------------------------------------------------------------------------------------------------------------------------------------------------------------------------------------------------------------|-------------------------------------------------------------------------|
| Number                         | 22                                                                                                                                                                                                                      | 22                                                                      |
| Age at diagnosis               | Mean(sd) 46.3 (10.4)                                                                                                                                                                                                    | 47.9 (10.4)                                                             |
| Sex                            | Male, n (%) 21 (95.5%)                                                                                                                                                                                                  | 21 (95.5%)                                                              |
| Ethnicity                      | Non-Hispanic 20 (90.9%)                                                                                                                                                                                                 | 20 (90.9%)                                                              |
| Race                           | Black, n (%) 3 (13.6%)<br>White, n (%) 16 (72.7%)<br>Other, n (%) 3 (13.6%)                                                                                                                                             | 3 (13.6%)<br>17 (77.3%)<br>2 (9.1%)                                     |
| ECOG status                    | Mean(sd) 1.2 (1.4)                                                                                                                                                                                                      | 0.7(0.6)                                                                |
| Type of lymphoma               | NHL-DLBCL, n (%) 12 (54.5%)<br>NHL-primary CNS, n (%) 1 (4.5%)<br>NHL-Burkitt's, n (%) 4 (18.2%)<br>HL-mixed cellularity, n (%) 2 (9.1%)<br>HL-nodular sclerosis, n (%) 2 (9.1%)<br>HL-lymphocytic rich, n (%) 1 (4.5%) | 12 (54.5%)<br>1 (4.5%)<br>4 (18.2%)<br>2 (9.1%)<br>2 (9.1%)<br>1 (4.5%) |
| Stage of lymphoma at diagnosis | Stage II, n (%) 2 (9.1%)<br>Stage III, n (%) 4 (18.2%)<br>Stage IV, n (%) 16 (72.7%)                                                                                                                                    | 2 (9.1%)<br>5 (22.7%)<br>15 (68.2%)                                     |
| IPI                            | IPI-high, n (%) 5 (22.7%)<br>IPI-low, n (%) 4 (18.2%)<br>IPI-mid, n (%) 3 (13.6%)<br>IPI-n/a, n (%) 10 (45.5%)                                                                                                          | 1 (4.5%)<br>4 (18.2%)<br>6 (27.3%)<br>11 (50%)                          |
| IPS                            | IPS-high, n (%) 3 (13.6%)<br>IPS-low, n (%) 1 (4.5%)<br>IPS-mid, n (%) 1 (4.5%)<br>IPS-n/a, n (%) 17 (77.3%)                                                                                                            | 1 (4.5%)<br>2 (9.1%)<br>2 (9.1%)<br>17 (77.3%)                          |
| Number of relapse              | 0, n (%) 22 (100%)<br>1, n (%) 0 (0%)                                                                                                                                                                                   | 21 (95.5%)<br>1 (9.1%)                                                  |

Sd= standard deviation, n/a= not applicable, ECOG= Eastern Cooperation Oncology Group, NHL= Non Hodgkin's lymphoma, DLBCL = Diffuse large B-cell lymphoma, CNS= Central nervous system, HL= Hodgkin's lymphoma, IPI= International Prognostic Index, IPS= International prognostic score
